# Supplementary material for: Utilizing the Dog Genome in the Search for Novel Candidate Genes Involved in Glioma Development—Genome Wide Association Mapping followed by Targeted Massive Parallel Sequencing Identifies a Strongly Associated Locus
Source: PubMed Central journal article supplement (PMC4865040; doi:10.1371/journal.pgen.1006000), 2016-05-12

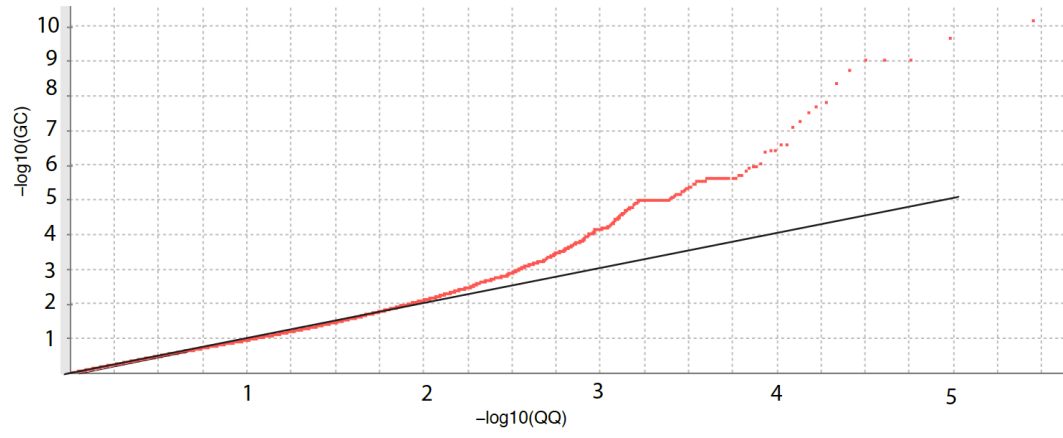

Supplement: pgen.1006000.s003.pdf [file pgen.1006000.s003.pdf]
